# Supplementary material for: Chemical labeling achieves 8-oxo-7,8-dihydroguanine mapping in the microRNA transcriptome
Source: Royal Society of Chemistry journal article supplement (doi:10.1039/d2cc06273a), 2023-01-01
Supplement: d2cc06273a1.pdf [file d2cc06273a1.pdf]

1 **Electronic Supplementary Information (ESI)**

2

3 **Chemical labeling achieves 8-oxo-7,8-dihydroguanine mapping in**  
4 **microRNA transcriptome**

5 Changjiang Fan,<sup>\* a,b</sup> Xinyue Meng,<sup>a,b</sup> Wei Yang,<sup>a,b</sup> Peiyan Wang,<sup>a,b</sup> Wenguang Chang,<sup>a</sup>

6 Peifeng Li,<sup>\* a</sup> and Jianxun Wang<sup>\* a,b</sup>

7

8 <sup>a</sup> Institute for Translational Medicine, The Affiliated Hospital of Qingdao University,  
9 Qingdao Medical College, Qingdao University, Qingdao 266021, Shandong, P. R.  
10 China.

11 <sup>b</sup> School of Basic Medicine, Qingdao Medical College, Qingdao University, Qingdao  
12 266071, Shandong, P. R. China.

13

## 14 Materials and Methods

### 15 Synthesis of N-(3-azidopropyl)-spermine-5-carboxamide (APSC)

16 The N-(3-azidopropyl)-spermine-5-carboxamide (APSC) was designed, and then  
17 custom-synthesized in Chemily Glycoscience (Georgia, USA) that provided the  
18 synthesis process as follows:

#### 19 *Synthesis of Compound 1*

20 A solution of 3-amino-1-propanol (0.750 mL, 737 mg, 9.82 mmol) in tetrahydrofuran  
21 (THF, 7 mL) was added with di-tert-butylidicarbonate (Boc<sub>2</sub>O, 2.35 g, 10.8 mmol) and  
22 then a solution of sodium carbonate (2.08 g, 19.6 mmol) in H<sub>2</sub>O (5 mL). After  
23 vigorously stirring for 2 h, the reaction mixture was poured over ethyl acetate (EtOAc).  
24 The organic phase was washed with minimum amount of saturated sodium bicarbonate  
25 (NaHCO<sub>3</sub>) aqueous solution, separated, dried over MgSO<sub>4</sub>, filtered and concentrated  
26 under reduced pressure to provide a crude pale yellow oil (2 g, ~100%) that was used  
27 without further purification.

28 This crude alcohol (1.05 g, 6 mmol) was dissolved in dichloromethane (CH<sub>2</sub>Cl<sub>2</sub>, DCM,  
29 7 mL), and followed by adding 3 mL of KBr (722 mg, 6.07 mmol) aqueous solution and  
30 2,2,6,6-tetramethylpiperidinoxy (TEMPO, 9 mg, 0.06 mmol), and the mixture was  
31 cooled to 0 °C. After stirring for 10 min, a solution of NaOCl (492 mg, 6.61 mmol) and  
32 NaHCO<sub>3</sub> (1.84 g, 21.9 mmol) in H<sub>2</sub>O (9 mL) was added dropwise. After stirring for 1.5  
33 h, additional NaOCl (104 mg, 1.4 mmol) was added, and thin-layer chromatography  
34 (TLC) analysis indicated that the starting material was consumed within 20 min. The  
35 product was extracted with DCM for two times. The combined organic phase was  
36 separated, dried over anhydrous magnesium sulfate (MgSO<sub>4</sub>), filtered and concentrated  
37 under reduced pressure. The crude product was purified via column chromatography to  
38 afford the desired compound 1 (792 mg, 76 %).

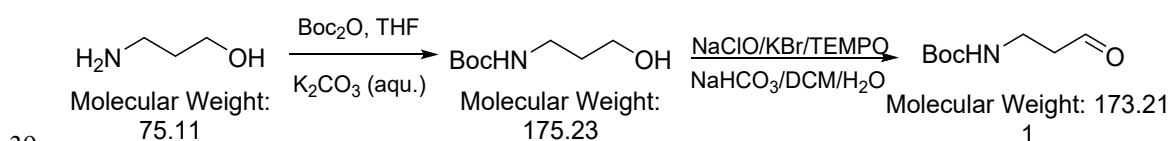

#### 40 *Synthesis of Compound 2*

41 Thionyl chloride (2.24 g, 18.8 mmol) was added into a solution of N'-

42 benzyloxycarbonyl-L-ornithine (N'-Cbz-L-ornithine, 1.00 g, 3.76 mmol) in anhydrous  
43 methanol (MeOH, 25 mL) at 0 °C. After completing the addition, the reaction mixture  
44 was stirring for 18 hours at room temperature. The reaction system was then  
45 concentrated under reduced pressure to obtain a yellowish solid. Recrystallization with  
46 MeOH:ethyl acetate (EtOAc) (1:6) afforded the desired compound 2 as a white solid  
47 (600 mg, 0.190 mmol). The filtrate and EtOAc washings were cooled for 48 h at -20°C  
48 to provide additional product (177mg, 0.561 mmol). The two batches (total: 777 mg, 65  
49 %) were combined for further use.

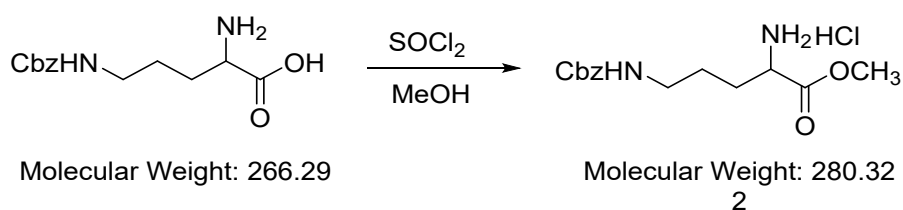

50

### 51 *Synthesis of Compound 3*

52 Compound 1 (988 mg, 5.7 mmol) was added into the solution of Compound 2 (1.6 g,  
53 5.7 mmol) in anhydrous MeOH (30 mL). The reaction mixture was stirred for 10 min at  
54 room temperature, followed by addition of NaBH<sub>3</sub>CN (359 mg, 5.7 mmol). The reaction  
55 was monitored by liquid chromatography mass spectrometry (LC-MS) until starting  
56 material disappeared. The reaction was then quenched by saturated K<sub>2</sub>CO<sub>3</sub> aqueous  
57 solution and extracted with chloroform (CHCl<sub>3</sub>). After removing solvent, the residue  
58 was purified by the flash chromatography (EtOAc/Hexane 0 to 3/1) to afford pure  
59 compound 3. Yield is always about 60%.

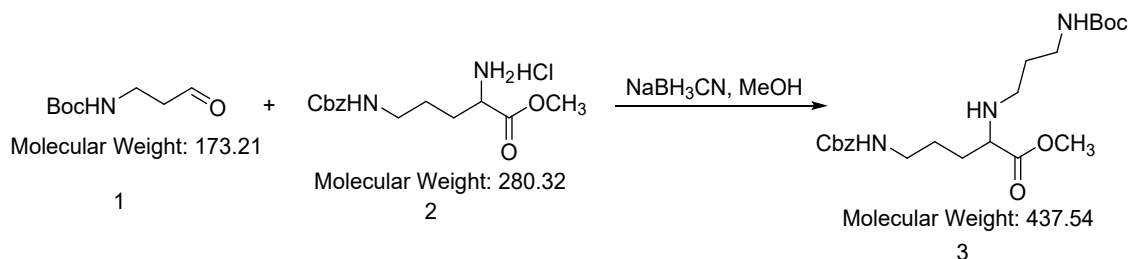

60

61

### 62 *Synthesis of Compound 4*

63 Compound 3 (1.618 g, 3.7 mmol) was dissolved in tetrahydrofuran (THF, 20 mL) and  
64 saturated K<sub>2</sub>CO<sub>3</sub> (766 mg in 10 mL water) was added. And then, Boc<sub>2</sub>O (1.21 g, 5.55



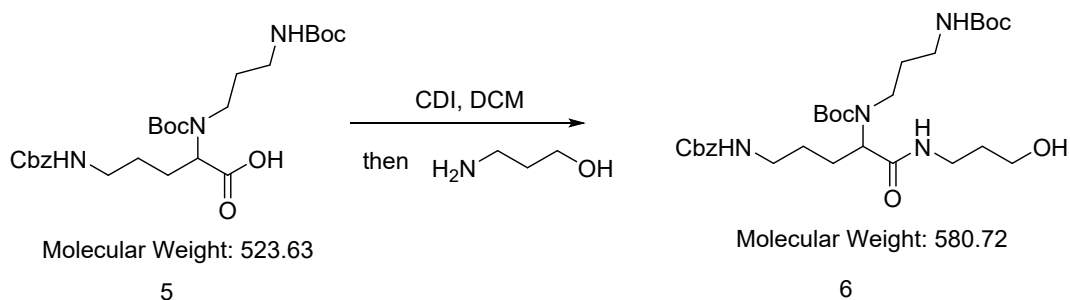

85

86 *Synthesis of Compound 7*

87 Compound 6 (1.51 g, 2.88 mmol) was dissolved in EtOAc (20 mL) and Pd/C (150 mg,  
 88 10% w/w) was added. The mixture was shaken at the atmosphere of H<sub>2</sub> (50 psi) and  
 89 reaction was monitored by LC-MS. The mixture was filtered through celite. The filtrate  
 90 was then concentrated to afford crude compound 7 which was used without further  
 91 purification.

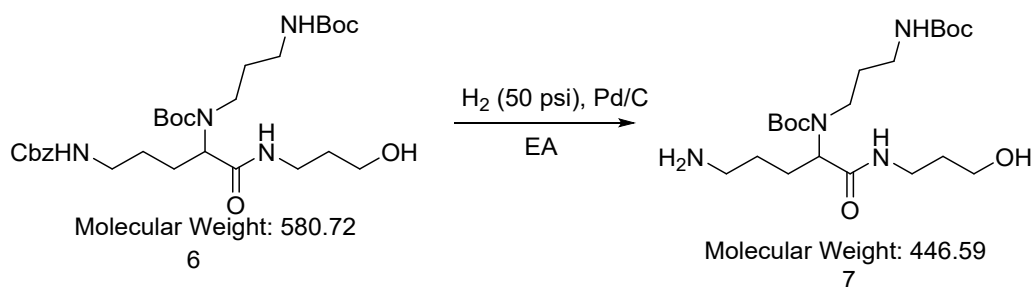

92

93 *Synthesis of Compound 8*

94 Compound 7 (1.286 g) was dissolved in anhydrous MeOH (30 mL). Compound 1 (498  
 95 mg, 2.88 mmol) was then added. The reaction was then monitored by LC-MS until the  
 96 starting material disappeared. The reaction was then quenched by saturated K<sub>2</sub>CO<sub>3</sub> and  
 97 extracted with CHCl<sub>3</sub>. The solvent was then removed and the residue was used in the  
 98 next step without further purification.

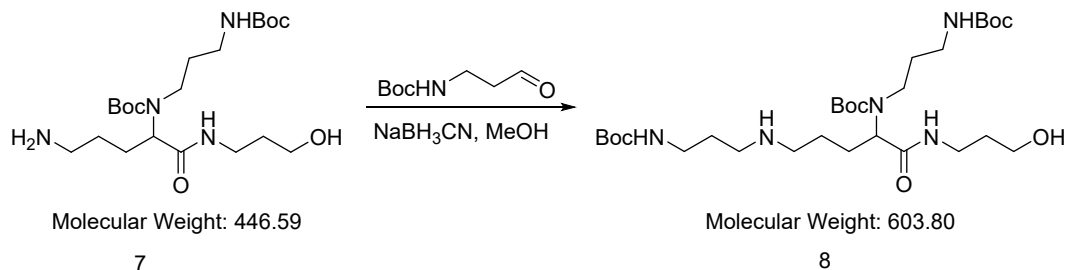

99

100 *Synthesis of Compound 9*

101 Compound 8 (1.74 g) was dissolved in THF (20 mL) and saturated K<sub>2</sub>CO<sub>3</sub> (597 mg in

102 5 mL water) was added. Then  $\text{Boc}_2\text{O}$  (942 mg, 4.32 mmol) was added. The reaction was  
 103 monitored by LC-MS. The reaction system was diluted with EtOAc and the organic  
 104 layers were combined and washed with saturated  $\text{NaHCO}_3$ . The solvent was  
 105 concentrated under reduced pressure. The residue was purified by the flash  
 106 chromatography (EtOAc/Hexane 0 to 1/1) to afford the pure compound 9 (751 mg,  
 107 1.067 mmol).

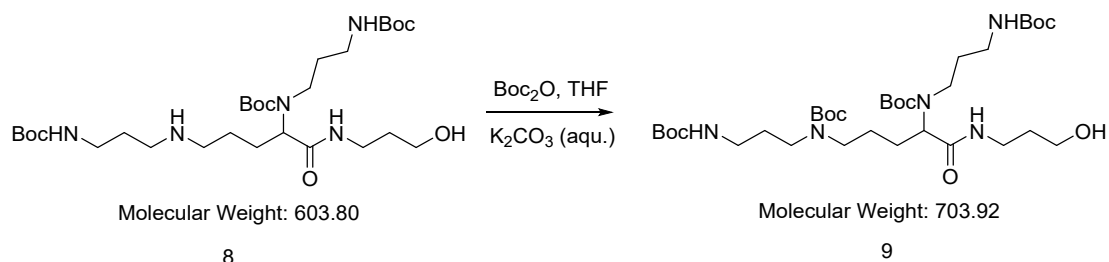

108

### 109 *Synthesis of Compound 10*

110 Compound 9 (751 mg, 1.067 mmol) was dissolved in anhydrous DCM (15 mL) and the  
 111 solution was cooled to 0 °C. Triethylamine ( $\text{NEt}_3$ , 0.22 mL, 1.6 mmol) was added and  
 112 followed by the slow addition of methanesulfonyl chloride ( $\text{MsCl}$ , 90  $\mu\text{L}$ , 1.05 mmol).  
 113 The reaction was then stirred at 0 °C for 1 hour when TLC indicated that all the starting  
 114 material disappeared. The reaction was quenched by brine and extracted by  $\text{CHCl}_3$ . The  
 115 combined organic layers was evaporated under reduced pressure. The residue was used  
 116 in the next step without further purification.

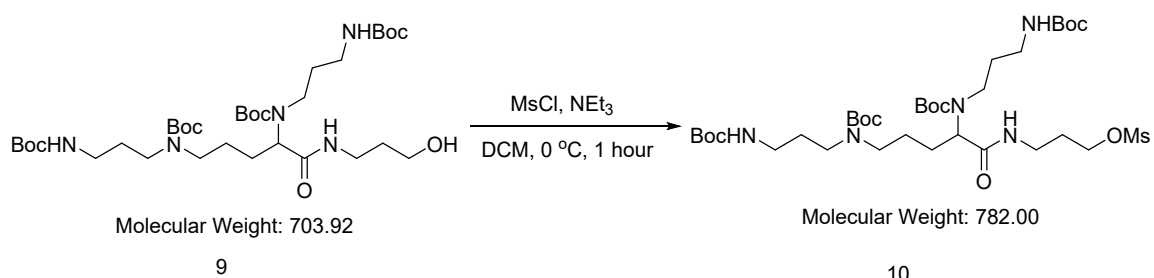

117

### 118 *Synthesis of Compound 11*

119 Compound 10 (835 mg, 1.067 mmol) was dissolved in anhydrous DMF (15 mL).  $\text{NaN}_3$   
 120 (104 mg, 1.6 mmol) was added and the reaction was heated to 70 °C. After the reaction  
 121 was complete indicated with LC-MS, the reaction system was cooled down to room  
 122 temperature. Brine was added and the mixture was extracted by methyl tert-butyl ether.  
 123 The solvent was then removed under reduced pressure and the residue was then

124 subjected to flash chromatography to afford pure compound 11 (450 mg, 0.617 mmol).

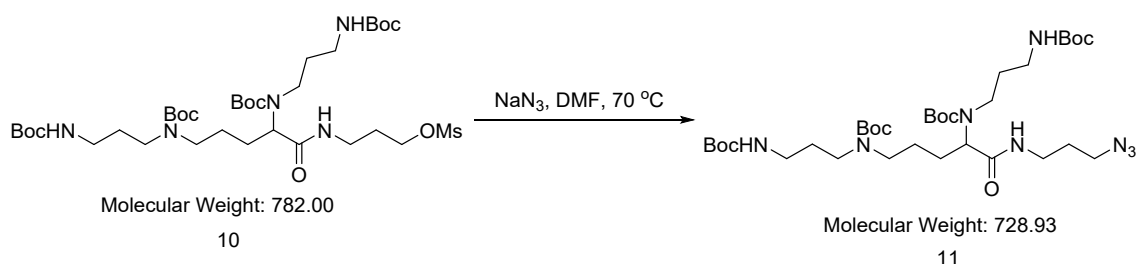

125

### 126 *Synthesis of APSC hydrochloride*

127 Compound 11 (450 mg, 0.617 mmol) was dissolved in a solution of 4M HCl in dioxane  
128 (10 mL) and stirred overnight. The reaction mixture was subjected to ultrasonic  
129 treatment for 2 hours, during which a lot of light yellow precipitate formed. The solvent  
130 was removed and the solid was collected to afford light yellow solid (292 mg), namely  
131 APSC hydrochloride.

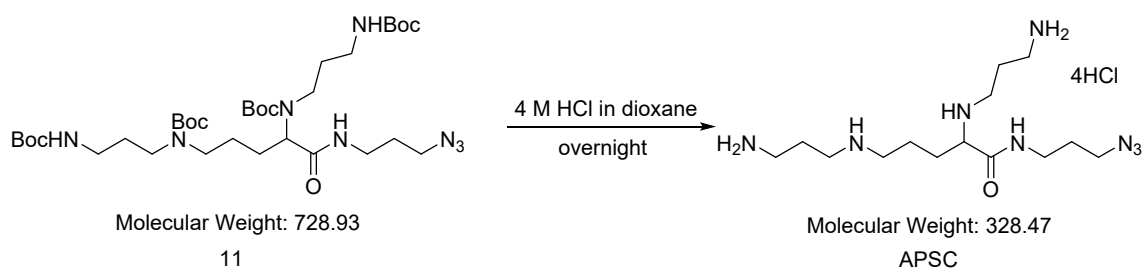

132

### 133 **8-oxoGua labeling with APSC**

134 The 10-nt DNA or RNA templates with or without an 8-oxoGua (15  $\mu$ M) was incubated  
135 with APSC (0.3 mM) in 18  $\mu$ L of sodium phosphate buffer (SPB, 20 mM, pH 7.5), and  
136 2  $\mu$ L of  $K_3Fe(CN)_6$  (6 mM) or  $Na_2IrCl_6$  (1 mM) was added.<sup>1,2</sup> After gentle mixing with  
137 a pipette, the reaction was carried out for 30 min at 25  $^{\circ}$ C and then quenched by adding  
138 5  $\mu$ L of EDTA solution (20 mM, pH 8.0). The DNA/RNA was precipitated in 1.5  
139 volumes of 100% isopropanol after adding 2  $\mu$ L of glycogen (10 mg/mL, Thermo) at -  
140 20  $^{\circ}$ C overnight. The DNA/RNA pellet was obtained through centrifuging for 10 min  
141 at 12000 rpm at 4  $^{\circ}$ C and washed with 80% ethanol, which was dissolved in deionized  
142 water.

143 Considering the fact that APSC has two primary amine groups, two different isomers  
144 of adducts may be formed during the oxidation/addition step. However, no matter  
145 which adduct isomer form is formed, it will not affect the subsequent pull-down of 8-  
146 oxoGua-containing nucleic acids.

147 The 10-nt DNA used in this experiment is presented below:

148 5'-CAGTAXTGAC-3' X = 8-oxoGua

149 The 10-nt RNA used in this experiment is presented below:

150 5'-CAGUAXCGAC-3' X = 8-oxoGua

151 **The reactions of APSC with synthetic DNA containing 8-BrGua, 8-oxoAde, or 5-**  
152 **fCyt and RNA containing 8-oxoGua**

153 The 10-mer DNAs (15  $\mu$ M) containing an 8-BrGua, 8-oxoAde, or 5-fCyt and 21-nt  
154 RNA containing an 8-oxoGua were reacted with  $K_3Fe(CN)_6$  (0.6 mM) in the presence  
155 of APSC (0.3 mM) in 20  $\mu$ L of SPB (20 mM, pH 7.5) treated with diethyl pyrocarbonate  
156 (DEPC) (named as RNase-free SPB), respectively. After incubation for 30 min at 25  
157  $^{\circ}C$ , the reaction was quenched with EDTA (1mM, pH 8). The DNA was precipitated in  
158 isopropanol and washed with 80% ethanol. They were dissolved in 10  $\mu$ L of RNase-  
159 free water DNA.

160 The 10-mer DNA templates (Takara) used in this experiment are presented below:

161 5'-CAGTAXTGAC-3' X = dG

162 5'-CAGTAYTGAC-3' Y = 8-BrGua

163 5'-GTACGACXTG-3' X = 8-oxoAde

164 5'-GTACGAYATG-3' Y = 5-fCyt



165 The 21-nt RNA template (Takara) used in this study is presented below.

166 5'-CGAUAUCGUAUCXCGUAUCGC-3' X = 8-oxoGua

### 167 **Cell Culture**

168 4T1 breast carcinoma cells were obtained from Dr. Peipei Shan, and cultured in the  
169 RPMI-1640 medium (Sigma-Aldrich) supplemented with 10% fetal bovine serum  
170 (FBS, Biological Industries), 100  $\mu$ M nonessential amino acids, 100  $\mu$ M sodium  
171 pyruvate, 100  $\mu$ g/ml streptomycin-100 unit/ml penicillin in a 5% CO<sub>2</sub> incubator at 37  
172 °C.

173 Human aortic vascular smooth muscle cells (VSMCs) were originally purchased from  
174 ATCC. They were cultured in the Dulbecco's Modified Eagle's Medium (DMEM,  
175 Gibco) supplemented with 10% FBS, and 100 units/mL penicillin-100  $\mu$ g/mL  
176 streptomycin (Hyclone) at 37 °C, 5% CO<sub>2</sub> atmosphere. Cells were passed at 70-80% of  
177 confluency by using the solution of trypsin (0.25%)-EDTA (0.02%) in DMEM. For  
178 H<sub>2</sub>O<sub>2</sub> treatment, the VSMCs were cultured in the medium supplemented with 100  $\mu$ M  
179 H<sub>2</sub>O<sub>2</sub> for 12 h.<sup>3</sup>

### 180 **Preparation of cellular DNA and small RNAs**

181 Genomic DNA was extracted from VSMCs by using genomic DNA extraction kits  
182 (Tiangen Biotech, Beijing, China), in which 2-mercaptoethanol (100 mM) was  
183 supplemented in the solutions. VSMC genomic DNA and rat genomic DNA (obtained  
184 from Dr. Tao Xu) was dissolved in 50  $\mu$ L of Tris-HCl buffer (10 mM, pH 8.0),  
185 respectively, and the concentration was determined with a Nanodrop (Thermo Fisher  
186 Scientific).

187 50 µg of genomic DNA was diluted with 100 µL of Tris-HCl buffer (10 mM, pH 8.0)  
188 and then sonicated into 150-300 bp with a focused-ultrasonicator (M220, Covaris). To  
189 inhibit adventitious formation of 8-oxoGua, the antioxidant, 2-mercaptoethanol (100  
190 mM), was used in the steps for DNA extraction and fragmentation by sonication. The  
191 fragmented DNA was precipitated with isopropanol in the presence of glycogen at -20  
192 °C overnight. After centrifugation, the DNA pellet was washed twice with 80% ethanol,  
193 and dissolved in 40 µL of SPB (20 mM, pH 7.5).

194 The small RNAs (< 200 bp in length) were extracted from the VSMCs and 4T1 cells  
195 (obtained from Dr. Peipei Shan) with miRNA isolation kit (DP501, Tiangen Biotech),  
196 in which 2-mercaptoethanol (100 mM) was supplemented in solutions, respectively.  
197 They were recovered and purified with twice ethanol precipitation in the presence of  
198 glycogen. The RNA pellet was re-suspended in 50 µL of the RNase-free SPB (20 mM,  
199 pH 7.5); its concentration was measured by using the Nanodrop, and about 40 µg for  
200 each group was obtained.

#### 201 **8-oxoGua labeling and pull-down enrichment**

202 8-oxoGua tagging with APSC was carried out as described above. Synthetic DNA  
203 template (1 nmol) was reacted with APSC (0.3 mM) and  $K_3Fe(CN)_6$  (0.6 mM) in 50  
204 µL of reaction mixture. For genomic DNA, 40 µg of the DNA fragments (150-300 bp)  
205 was also labeled in the 50 µL of SPB (20 mM, pH 7.5) containing 0.3 mM of APSC  
206 and 0.6 mM of  $K_3Fe(CN)_6$ . For small RNA, the 8-oxoGua labeling was carried out in  
207 50 µL of RNase-free SPB (20 mM, pH 7.5) containing 20 µg of RNAs, 0.3 mM of  
208 APSC, and 0.6 mM of  $K_3Fe(CN)_6$ . All the reactions were carried out for 30 min at 25

209 °C, and NA samples were then precipitated with isopropanol in the presence of  
210 glycogen at -20°C overnight, respectively.

211 The resultant 8-oxoGua-N<sub>3</sub> was purified via twice precipitation with isopropanol in the  
212 presence of glycogen, and then dissolved in 40 uL of 10 mM Tris-HCl buffer (pH 7.4),  
213 respectively. The click chemistry was carried out by adding the biotin-terminated  
214 functional linker with disulfide and DBCO (200 μM) and followed by incubating at 37  
215 °C for 3 hours at 800 rpm in the Eppendorf thermomixer.<sup>4</sup> The sample was purified by  
216 twice isopropanol precipitation and washing with 80% ethanol.

217 The pull-down of biotinylated NAs (namely 8-oxoGua-N<sub>3</sub>-S-S-Biotin) was carried out  
218 with the streptavidin-coated magnetic beads (65001, Invitrogen) according to  
219 manufacturer's instructions with minor modifications. Tween-20 was added into the  
220 washing and binding buffer at final concentration of 0.01% and 0.02% (v/v),  
221 respectively. 40 μL of magnetic bead suspension was used for binding of 8-oxoGua-  
222 N<sub>3</sub>-S-S-Biotin in each sample. After washing the beads at least six times, 50 μL of  
223 dithiothreitol (DTT) solution (60 mM) in RNase-free water was employed to release  
224 8-oxoGua-containing NA fragments (namely 8-oxoGua-N<sub>3</sub>-SH) by incubating at 25 °C  
225 for 1 h under vortexing at 1200 rpm. The solution of 8-oxoGua-N<sub>3</sub>-SH was collected  
226 after separating the magnetic beads with a magnet, recovered via isopropanol  
227 precipitation, and then dissolved in 20 μL of RNase-free water.

228 A 12-mer DNA template (Takara) used in this experiment is presented below:

229 5'-CCGXAATTGGCC-3' X = 8-oxoGua

230 **Amplification assay of DNA containing 8-oxoGua-N<sub>3</sub>-SH using polymerase chain**  
231 **reaction (PCR)**

232 The 100-mer single-stranded DNA (100 ng) containing an 8-oxoGua was subjected to  
233 8-oxoGua pull-down protocol. The enriched 8-oxoGua-N<sub>3</sub>-SH was acted as the  
234 template to perform PCR using various commercial DNA polymerases, including Deep  
235 Vent® (exo-) DNA Polymerase (NEB), TruePrep Amplify Enzyme (Vazyme), Pfu  
236 DNA Polymerase (Promega), Q5® High-Fidelity DNA Polymerases (NEB), according  
237 to the manufacturer's instructions, respectively. Besides, as the control, the 8-oxoGua  
238 pull-down protocol was also carried out on the model DNA except APSC tagging,  
239 followed by PCR with Deep Vent® (exo-) DNA Polymerase (NEB). Reaction mixtures  
240 were incubated at 95 °C for 5 minutes, followed by 30 cycles of 15 s at 95 °C, 30 s at  
241 55 °C, and 15 s at 72 °C. The PCR products were analyzed by electrophoresis on 1.5%  
242 agarose gels and imaged under UV light after staining with 1×Ultra GelRed Nucleic  
243 Acid Stain (Vazyme). The 100 bp DNA Ladder (Vazyme) was used as a size marker.  
244 The 100-mer single-stranded DNA (Takara) used in this study is presented below:

245 5'-

246 CCTCACCATCTCAACCAATATTATATTACGCGTATATCGCGTATAACXCGTA

247 TATCGCGTATCGCGTATTTTCGCGTTATAATATTGAGGGAGAAGTGGTGA-3'

248 X = 8-oxoGua or G

249 The sequences of PCR primers (Sangon Biotech Co., Ltd, Shanghai, China) were as  
250 follows:

251 Forward primer: 5'-CCTCACCATCTCAACCAATA-3'

252 Reverse primer: 5'-TCACCACTTCTCCCTCAATA-3'

### 253 **Fluorescence labeling of 8-oxoGua**

254 As described above, synthetic 35-bp synthetic DNA and 21-nt RNA templates with or  
255 without 8-oxoGua (1 nmol), VSMC DNA (5 µg), and VSMC RNA (5 µg) was reacted  
256 with APSC (0.3 mM) in 50 µL of SPB (20 mM, pH 7.5) in the presence of  $K_3Fe(CN)_6$   
257 (0.6 mM), respectively. The resultant 8-oxoGua- $N_3$  was obtained by isopropanol  
258 precipitation, and then dissolved in 40 µL of 10 mM Tris-HCl buffer (pH 7.4)  
259 containing FITC-DBCO (200 µM). The reaction was carried out at 37 °C for 3 hours,  
260 and purified by twice precipitation in isopropanol. The FITC-labeled samples were  
261 dissolved in 10 mM Tris-HCl buffer (pH 7.4).

262 The 35-bp DNA template (Takara) used in this study is presented below (The  
263 complementary strand is not listed):

264 5'-AATTCGAGCTGGCGCGXACGTATGAGGAGCGGTAC-3' X = 8-oxoGua

### 265 **Quantification of 8-oxoGua by fluorescence assay**

266 DNA content was determined using a Nanodrop. The fluorescence intensity of FITC-  
267 labeled sample was measured, respectively, at an excitation wavelength of 495 nm and  
268 emission wavelength of 525 nm in a 96-well plate with 50 µL of solution per well using  
269 a micro-plate reader. For the 35-bp DNA templates, the graph was plotted with the  
270 fluorescence intensity versus corresponding 8-oxoGua concentration, which was also  
271 served as standard curve. The 8-oxoGua content of VSMC DNA (100 ng) after adding  
272 DNA templates, including 52 nM, 104 nM, or 156 nM, was also determined. In

273 addition, the fluorescence intensity was measured for calculation of 8-oxoGua content  
274 in DNA and RNA of the VSMCs treated with or without H<sub>2</sub>O<sub>2</sub>, respectively.

#### 275 **Dot-blot assays**

276 The synthetic DNA templates with or without 8-oxoGua, cellular DNAs and RNAs  
277 were labeled with FITC, and purified, respectively. Each of them (60 ng/μL) was  
278 spotted on a positively charged nylon membrane (INYC00010, Millipore). They were  
279 observed under a fluorescence imaging system (Tanon, 5200 Multi).

#### 280 **Spike-in study and qPCR validation of 8-oxoGua enrichment**

281 The spike-in and qPCR experiments were used to validate the specificity and efficiency  
282 of the protocol for labeling and pull-down of 8-oxoGua-containing NAs. 100 pg of  
283 synthetic 100-bp DNA template (Takara) with or without an 8-oxoGua was spiked into  
284 the 5 μg of rat genomic DNA fragments, respectively, followed by 8-oxoGua labeling  
285 and enrichment. In addition, the enrichment protocol was also performed on 4T1 cell-  
286 derived small RNAs (5 μg) spiked with synthetic 21-nt RNA containing an 8-oxoGua  
287 (2 ng).

288 All qPCR reactions were performed in triplicate using a CFX96 Real-Time PCR  
289 System (Bio-Rad). For DNA, 2 ng of the input (genomic DNA fragments spiked with  
290 model DNA) or pull-down DNA was used in a 20 μL of qPCR reaction containing 1×  
291 IQ SYBR Green Supermix (Bio RAD), forward primer (0.5 μM), and reverse primer  
292 (0.5 μM). Reaction mixtures were incubated at 95 °C for 5 minutes, followed by 40  
293 cycles of 15 s at 95 °C, 30 s at 55 °C, and 15 s at 72 °C.

294 The 100-bp DNA template (Takara) containing an 8-oxoGua used in this study is  
295 presented below (The complementary strand is not listed):

296 5'-

297 CCTCACCATCTCAACCAATATTATATTACGCGTATATCGCGTATACXCGTA

298 TATCGCGTATCGCGTATTTTCGCGTTATAATATTGAGGGAGAAGTGGTGA-3'

299 X = 8-oxoGua

300 The sequences of primers (Sangon Biotech Co., Ltd, Shanghai, China) were as follows:

301 Forward primer: 5'-CCTCACCATCTCAACCAATA-3'

302 Reverse primer: 5'-TCACCACTTCTCCCTCAATA-3'

303 For small RNA, cDNA was synthesized from the small RNAs (extracted from 4T1  
304 cells) spiked with model RNA (input) and enriched RNAs, respectively, using the 21-  
305 nt RNA-specific stem-loop primer (Sangon Biotech Co., Ltd, Shanghai). Typically, 50  
306 ng of RNA sample was respectively reverse-transcribed into cDNA in a 20  $\mu$ L of  
307 reaction mixture containing 100 nM stem-loop primer, 1 $\times$  PrimeScript Buffer 2  
308 (Takara), and 1  $\mu$ L PrimeScript RT Enzyme Mix I (Takara) using a T10 thermal cycler  
309 (Bio-Rad) at 37  $^{\circ}$ C for 15 min, 85  $^{\circ}$ C for 15 sec, and 4  $^{\circ}$ C for 5 min. The cDNA solution  
310 was diluted to a final volume of 100  $\mu$ L. 2  $\mu$ L of diluted cDNA was used in each 20  $\mu$ L  
311 of qPCR reaction containing 1 $\times$  IQ SYBR Green Supermix (Bio RAD), forward primer  
312 (0.5  $\mu$ M), and reverse primer (0.5  $\mu$ M). Reaction was run with an initial denaturation at  
313 20  $^{\circ}$ C for 5 min, followed by 40 cycles of 15 s at 95  $^{\circ}$ C, 30 s at 55  $^{\circ}$ C, and 15 s at 72  
314  $^{\circ}$ C. The sequences of primers (Sangon Biotech Co., Ltd, Shanghai) were as follows:

315 Stem-loop primer: 5'-GTCGTATCCAGTGCAGGGTCCGAGGTATTTCGCACTGG-

316 ATACGACGCGATAC-3'

317 Forward primer: 5'-GCAGGGTCCGAGGTATTC-3'

318 Reverse primer: 5'-CGATATCGTATCGCGTATCG-3'

319 Fold enrichment was calculated as  $2^{-dC_t}$ , where  $dC_t = C_t(\text{enriched}) - C_t(\text{Input})$ .

320 **Synthesis of DNA containing 5-hydroxycytosine (5-OHCyt) and RNA containing**  
321 **5-hydroxyuracil (5-OHUra)**

322 The 5-OHCyt-containing DNA is synthesized by PCR amplification using a modified  
323 deoxyribonucleoside triphosphate (dNTP), namely 5-hydroxy-2'-deoxycytidine-5'-  
324 triphosphate (5-hydroxy-dCTP, B8102, APEX BIO), and three conventional dNTP, i.e.  
325 2'-deoxyadenosine-5'-triphosphate (dATP), 2'-deoxyguanosine-5'-triphosphate  
326 (dGTP), and 2'-deoxythymidine-5'-triphosphate (dTTP). The plasmid containing Mfn2  
327 gene and Hieff<sup>®</sup> Taq DNA Polymerase (Yeasen, China) was used as the PCR template  
328 and DNA polymerase, respectively. The primers for synthesis of 5-OHCyt-containing  
329 DNA were listed below. The PCR product was purified with DNA clean beads (N411,  
330 Vazyme Biotech Co. Ltd, China), and examined by agarose gel. Besides, the control  
331 DNA template is synthesized with the same primer and conventional dNTPs, including  
332 dATP, dTTP, dCTP, and dGTP.

333 For preparation of the 5-OHUra-containing RNA, the DNA template containing T7  
334 promoter at the 5'-end is first synthesized by using the plasmid containing Mfn2 gene  
335 as the template. The primers for synthesis of the DNA containing T7 promoter were  
336 listed below. The 5-OHUra-containing RNA is synthesized using T7 high yield RNA



337 transcription kit (TR101, Vazyme Biotech Co. Ltd, China) after replacing uridine-5'-  
338 triphosphate (UTP) with 5-hydroxy-UTP (B8060, APEXBIO), purified with RNA clean  
339 beads (N412, Vazyme Biotech Co. Ltd, China), and examined by agarose gel. Besides,  
340 the control RNA template is synthesized with conventional NTPs, namely ATP, TTP,  
341 CTP, and GTP.

342 Primers for synthesis of 5-OHCyt-containing DNA:

343 Forward primer: 5'-CAAGGTCAGGGGAATCAGCG-3'

344 Reverse primer: 5'-GCTAGCTGGTTCACGGTCTT-3'

345 Primers for synthesis of the DNA containing T7 promoter:

346 Forward primer: 5'-TAATACGACTCACTATAGGGCAAGGTCAGGGGAATCAG-  
347 CG-3'

348 Reverse primer: 5'-GCTAGCTGGTTCACGGTCTT-3'

#### 349 **Pull-down yield assay**

350 8-oxoGua labeling and enrichment were carried out on synthetic model DNA and RNA  
351 for assessing their enrichment yields, respectively. 1  $\mu\text{g}$  of the 100-bp DNA or 21-nt  
352 RNA containing an 8-oxoGua was treated with 8-oxoGua labeling, and then pulled  
353 down by using 50  $\mu\text{L}$  of streptavidin magnetic beads (65001, Invitrogen), respectively.  
354 The DNA or RNA was recovered via isopropanol precipitation, followed by washing  
355 with 80% ethanol. After dissolving in 20  $\mu\text{L}$  of RNase-free water, their concentrations  
356 were measured with a Nanodrop.  $721.3 \pm 81.0$  ng of DNA-8-oxoGua and  $757.3 \pm 110.2$   
357 ng of RNA-8-oxoGua was harvested. As expected, almost no DNA and RNA without  
358 8-oxoGua modification was collected. In addition, the same labeling and pull-down

359 protocol was also performed on 4  $\mu\text{g}$  of 5-OHUrA-containing RNA and 5-OHCyt-  
360 containing DNA, respectively.  $0.014 \pm 0.003 \mu\text{g}$  of RNA (without 5-OHUrA),  $0.137 \pm$   
361  $0.019 \mu\text{g}$  of RNA-5-OHUrA,  $0.011 \pm 0.004 \mu\text{g}$  of DNA (without 5-OHCyt), and  $0.048$   
362  $\pm 0.004 \mu\text{g}$  of DNA-5-OHCyt was obtained.

### 363 **Native polyacrylamide gel electrophoresis (PAGE)**

364 Samples were suspended in 1 $\times$ DNA loading buffer and then loaded onto a 20%  
365 polyacrylamide gel (19:1) (Solarbio, Beijing, China). After electrophoresis, the gel was  
366 stained with SYBR Gold (Invitrogen) and visualized under UV light.

### 367 **Electrospray ionization-ion trap mass spectrometry (ESI-ITMS) analysis**

368 DNA and RNA samples were analyzed by electrospray ionization ion trap mass  
369 spectrometry (ESI-ITMS) in negative ion mode. The sample was dissolved in water and  
370 the final concentration is 2-5  $\mu\text{M}$ , and which was infused into the mass spectrometer  
371 (LCQ Deca XP, Thermo Finnigan) at a flow rate of 10  $\mu\text{L}/\text{min}$ . The source and  
372 desolvation temperatures were 110  $^{\circ}\text{C}$  and 350  $^{\circ}\text{C}$  respectively. Capillary voltage and  
373 cone voltage was set to 4.5 kV and 46 V, respectively. The data was processed by using  
374 the ProMass deconvolution software (Thermo Fisher Scientific).

### 375 **Library preparation and deep sequencing**

376 The 8-oxoGua enrichment described above as well as subsequent sequencing was  
377 termed as APSC-8-oxoGua-seq. For DNA sample, 50 ng of DNA fragments or pull-  
378 down 8-oxoGua-containing DNA fragments were used to prepare DNA sequencing-  
379 library with NEBNext Ultra II DNA Library Preparation Kit for Illumina (E7645, NEB)  
380 and NEBNext Multiplex Oligos for Illumina (E7600, NEB) according to

381 manufacturer's instructions. After adaptor ligation, cleanup of adaptor-ligated DNA  
382 was performed to remove adaptor contamination using 1.1 volumes of AMPure XP  
383 Beads. DNA library fragments of 200-400 bp were size selected with AMPure XP  
384 Beads after PCR amplification. The purified DNA libraries were paired-end sequenced  
385 on the Illumina NovaSeq platform (Berry Genomics, Beijing, China).

386 For small RNA, 40 ng of small RNAs (input) or pull-down 8-oxoGua-containing small  
387 RNAs was employed as starting material to construct small RNA sequencing-library  
388 by using VAHTS Small RNA Library Prep Kit for Illumina (NR801, Vazyme Biotech)  
389 and VAHTS Small RNA Index Primer Kit for Illumina (N813, Vazyme Biotech)  
390 following manufacturer's instructions. They were ligated with RNA 3' and 5' adapters,  
391 and then the reverse transcription was performed with the primer to the 3' adapter. After  
392 PCR amplification, the products were purified gel electrophoresis, and then sequenced  
393 on an Illumina HiSeq 2500 (LC-Sciences, Hangzhou, China).

#### 394 **G>T transversion test**

395 To evaluate G>T transversion at 8-oxoGua sites after the pull-down protocol and PCR,  
396 a 100-bp synthetic DNA template containing two 8-oxoGua was subjected to APSC-  
397 based 8-oxoGua labeling, enrichment, and sequencing (namely APSC-8-oxoGua-seq).  
398 This 100-bp synthetic DNA template (Takara) containing two 8-oxoGua is presented  
399 below (The complementary strand is not listed):

400 5'-

401 CCGCTCGAGATCGATCGATCGATCGATCGAATCXATCGATCGATCGATCG

402 ATCATCGTAGCATCXACATGATCGATCGAATCGATCGATCGAGGTACCCA-

403 3' X = 8-oxoGua

#### 404 **Bioinformatics analysis**

405 For DNA sequencing data, the raw FASTQ data were trimmed by using Trim\_Galore  
406 (version 0.6.6, parameters: --phred33 --length 36 --stringency 5 --paired) and were  
407 aligned to human reference genome, hg38, by using bowtie2 (version 2.3.5.1). Peak  
408 calling was performed using MACS2 (version 2.1.0) with the input sample as control  
409 ( $p < 0.01$ , fold-enrichment  $> 3$ ). Peak annotation was performed using HOMER.

410 For small RNA data, the raw sequencing reads were subjected to the ACGT101-miR  
411 program (LC Sciences, Houston, Texas, USA). The resultant unique sequences with  
412 length of 18-26 nt were aligned to precursors/mature miRNA in miRBase 22.0 to  
413 identify known miRNAs. The unmapped sequences were aligned to genome sequence  
414 of human (*Homo sapiens*, Ensembl\_v96) and the hairpin RNA structures containing  
415 sequences were predicted with the RNAfold software to identify potentially novel  
416 miRNAs. Total miRNA read counts were normalized and the relative expression was  
417 calculated. The differential expression was analyzed by using Fisher exact test and Chi-  
418 squared  $2 \times 2$  test, where  $p < 0.001$  was considered statistically significant.

419 G>T transversion was analyzed with an in-house Python script containing Bowtie. For  
420 model DNA template, random  $30 \times$  reads were selected for drawing the heatmap  
421 graphics using  $\log_{10}(\text{reads number})$ . For cellular miRNA, the target genes were  
422 predicted using online TargetScan and miRanda databases on the wild-type sequence  
423 and the sequences after the substitution of 8-oxoGua with U at 8-oxoGua sites,

424 respectively. The differential target genes were analyzed using the OmicStudio tools  
425 (<https://www.omicstudio.cn/tool>) for Gene Ontology (GO) analysis as well as Kyoto  
426 Encyclopedia of Genes and Genomes (KEGG) pathway analysis.

#### 427 **Statistical analysis**

428 The results were expressed as means  $\pm$  standard deviation (SD) with at least three  
429 parallel samples. The results of two groups were statistically analyzed with Student's  
430 t-test, and a significant difference was defined as  $p < 0.05$  unless stated otherwise.

#### 431 **Data availability**

432 Sequencing data of this study have been deposited into the National Center for  
433 Biotechnology Information (NCBI) under accession number PRJNA692633.

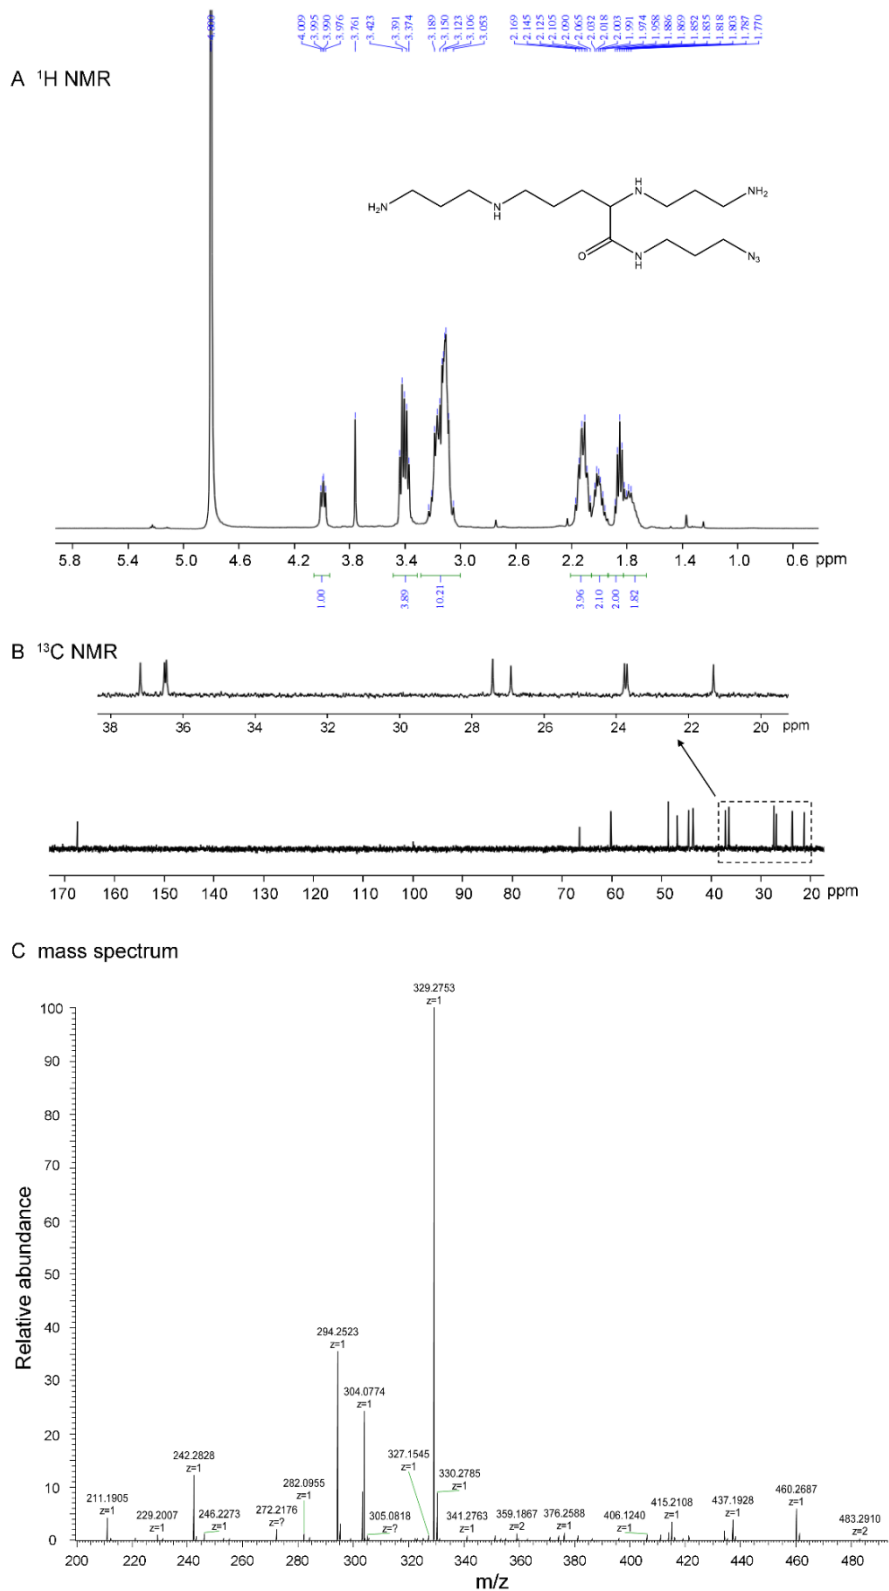

434

435 **Fig. S1.** NMR and mass spectroscopy characterization of APSC. (A)  $^1\text{H}$  NMR  
 436 spectrum, (B)  $^{13}\text{C}$  NMR spectrum, (C) mass spectrum.

437

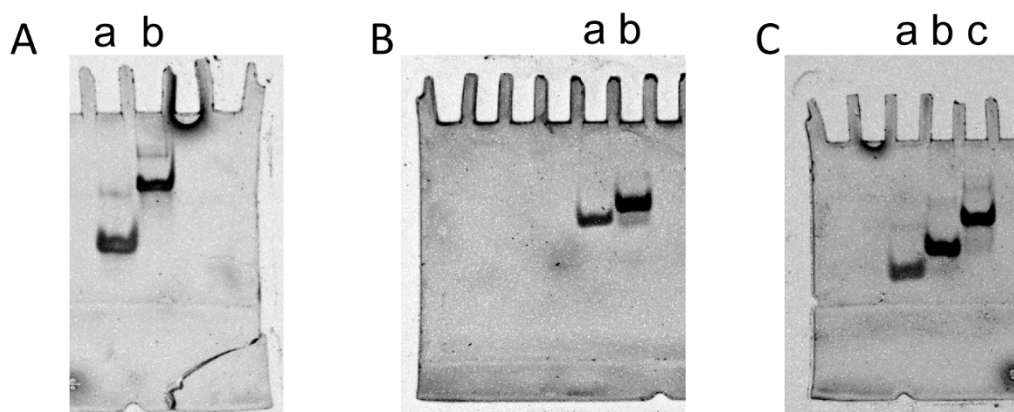

438

439 **Fig. S2.** Native polyacrylamide gel electrophoresis (PAGE) analysis for APSC adduct  
 440 formation with 8-oxoGua-containing 10-mer DNA (A) and 21-nt RNA (B) as well as  
 441 for enrichment process of 8-oxoGua-containing 12-mer DNA. (A) Lane a: 10-mer DNA  
 442 containing an 8-oxoGua, Lane b: 10-mer DNA containing an 8-oxoGua with APSC and  
 443  $K_3Fe(CN)_6$ . (B) Lane a: 21-nt RNA containing an 8-oxoGua, Lane b: 21-nt RNA  
 444 containing an 8-oxoGua with APSC and  $K_3Fe(CN)_6$ . (C) Lane a: 12-mer DNA  
 445 containing an 8-oxoGua, Lane b: 12-mer DNA-8-oxoGua- $N_3$ , Lane c: 12-mer DNA-8-  
 446 oxoGua-SH. The crude reaction mixtures are directly analysed by PAGE.

447

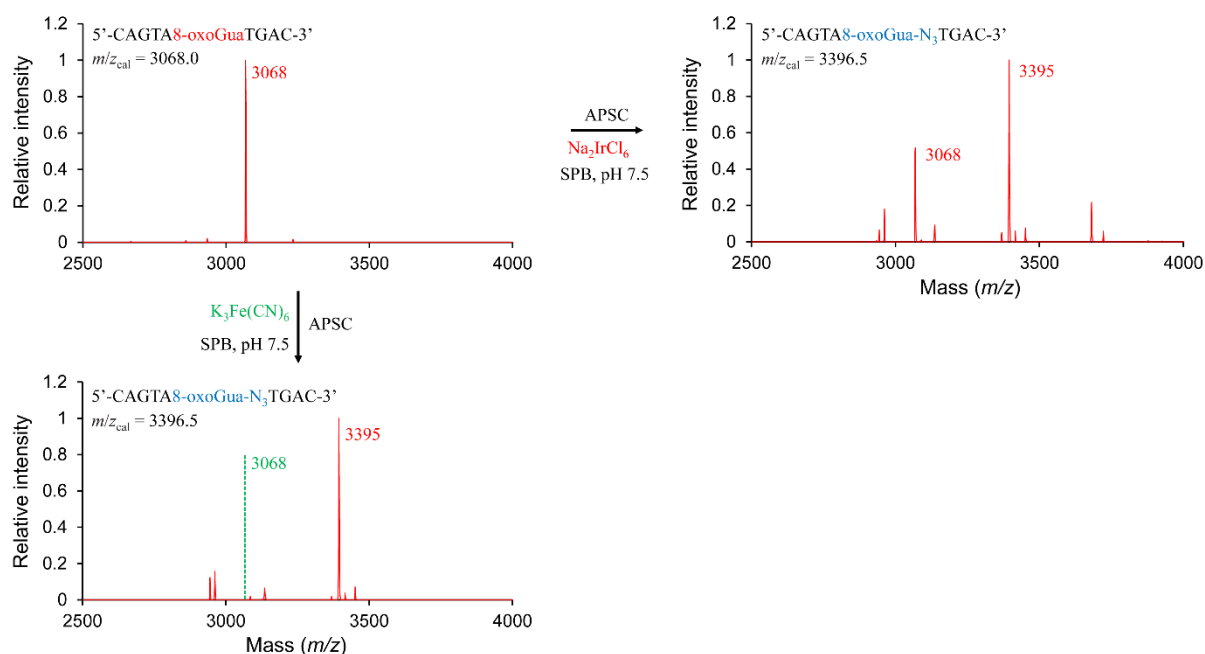

448

449 **Fig. S3.** The formation of APSC adduct in a 10-mer DNA containing an 8-oxoGua at  
 450 the presence of  $K_3Fe(CN)_6$  or  $Na_2IrCl_6$  in sodium phosphate buffer (SPB, 20 mM, pH  
 451 7.5), respectively. The higher reaction efficiency was observed under oxidation with  
 452  $K_3Fe(CN)_6$ .

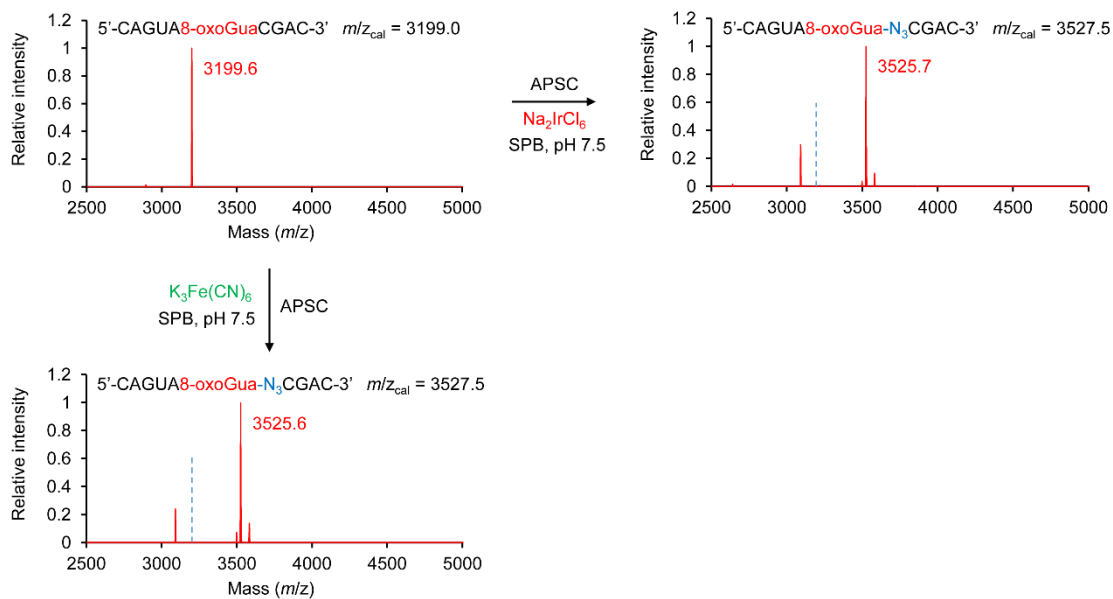

453

454 **Fig. S4.** The formation of APSC adduct in a 10-mer RNA containing an 8-oxoGua at  
 455 the presence of  $\text{K}_3\text{Fe}(\text{CN})_6$  or  $\text{Na}_2\text{IrCl}_6$  in SPB (20 mM, pH 7.5), respectively. The same  
 456 high reaction efficiency (almost 100%) was observed under both conditions.

457



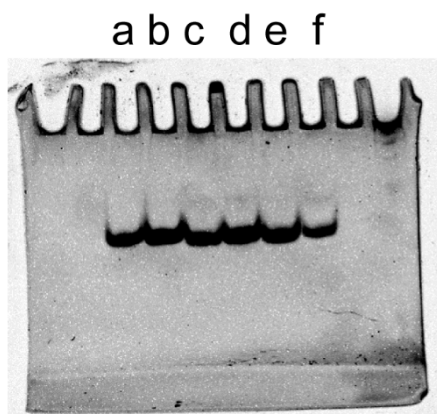

459

460 **Fig. S5.** PAGE analysis for the reaction between APSC and 10-mer DNA containing  
 461 8-BrGua, 8-oxoAde or 5-fCyt, respectively, upon oxidation with  $K_3Fe(CN)_6$ . Lane a:  
 462 8-BrGua, Lane b: 8-BrGua with APSC, Lane c: 8-oxoAde, Lane d: 8-oxoAde with  
 463 APSC, Lane e: 5-fCyt, Lane f: 5-fCyt with APSC. No APSC adducts were formed  
 464 in these reactions.

465

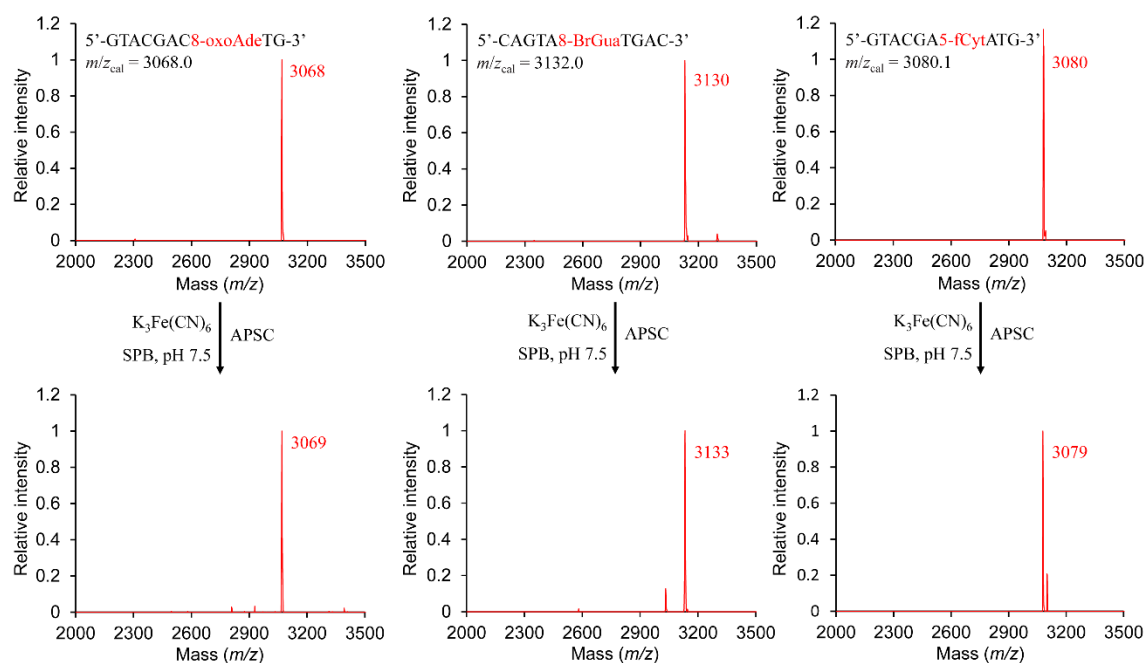

466

467 **Fig. S6.** Electrospray ionization-ion trap mass spectrometry (ESI-ITMS) analysis for  
 468 the reaction between APSC and 10-mer DNA containing 8-BrGua, 8-oxoAde or 5-fCyt,  
 469 respectively. No APSC adducts were detected.

470

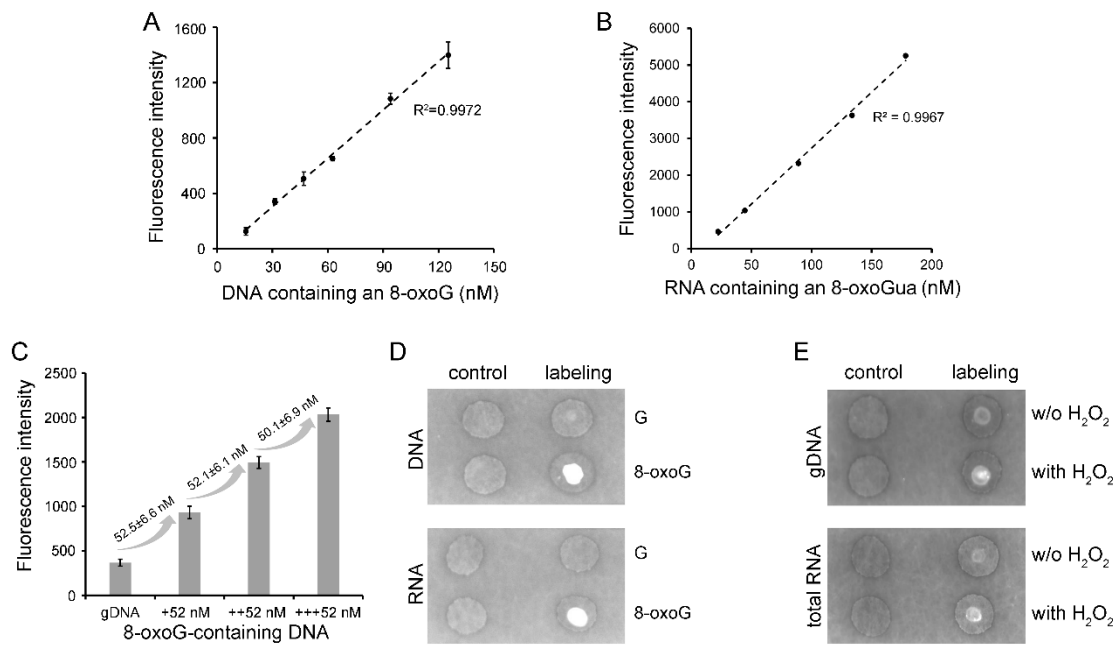

471

472 **Fig. S7.** Efficient labeling of 8-oxoGua in DNA and RNA, respectively, with APSC  
 473 and subsequent DBCO-FITC. Fluorescence intensity of FITC-labeled (A) DNA and  
 474 (B) RNA containing an 8-oxoGua is linearly related to DNA and RNA concentration,  
 475 respectively. (C) Determination of the increased concentration of 8-oxoGua-containing  
 476 DNA added into gDNA solution. The measured increase of 8-oxoGua concentration  
 477 (indicated with arrow) is in agreement with actual increase of 8-oxoGua concentration.  
 478 (D) Dot-blot assay of DNA or RNA templates labeled with APSC and DBCO-FITC.  
 479 Row G: The template without 8-oxoGua. Row 8-oxoGua: The template with an 8-  
 480 oxoGua. Lane control: The starting materials. Lane labeling: FITC-labeled samples. (E)  
 481 Dot-blot assay of gDNA and total RNA extracted from the VSMCs treated with or  
 482 without (w/o) H<sub>2</sub>O<sub>2</sub>, respectively. Lane control: The starting materials. Lane labeling:  
 483 FITC-labeled samples.

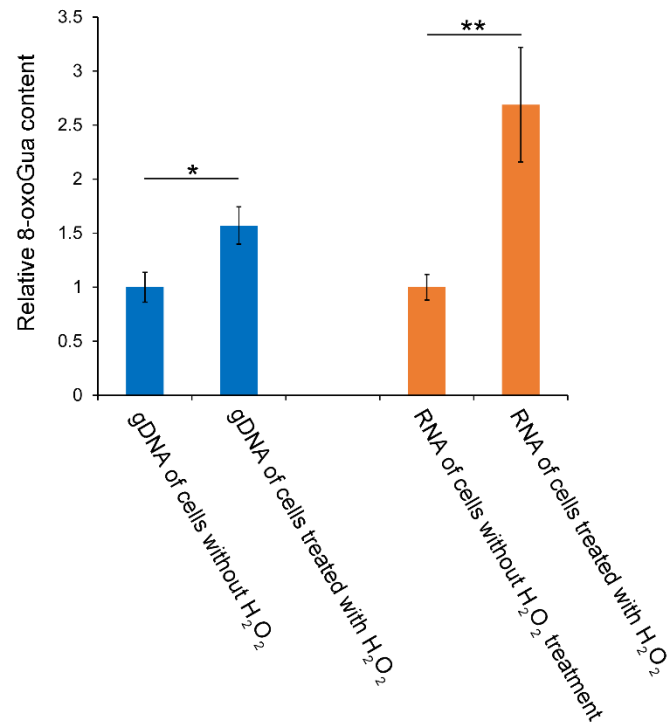

484

485 **Fig. S8.** Relative 8-oxoGua content in DNA and RNA of the VSMCs treated with or  
 486 without H<sub>2</sub>O<sub>2</sub>, respectively, measured after FITC labeling. Statistical significance is  
 487 indicated with \* ( $p \leq 0.05$ ) and \*\* ( $p \leq 0.01$ ).

488

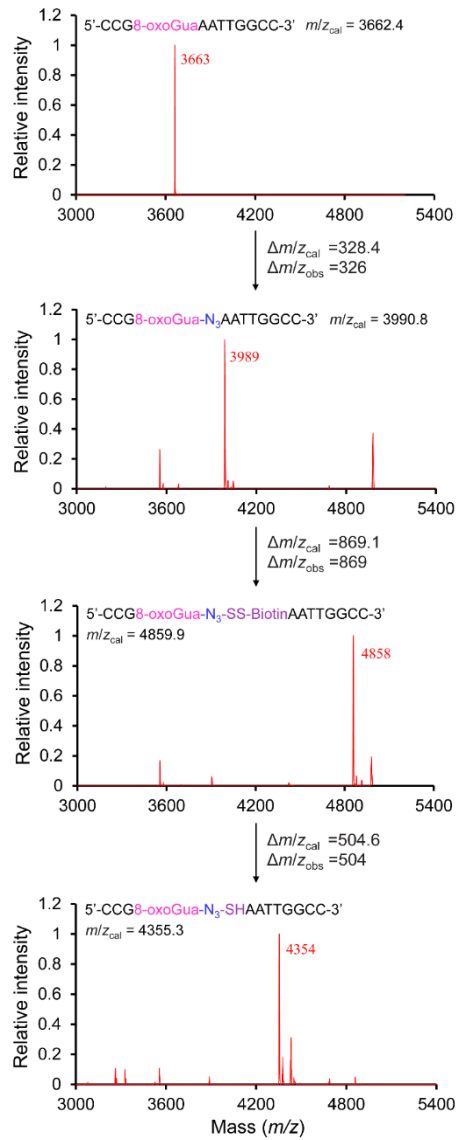

489

490 **Fig. S9.** ESI-ITMS characterization of the 12-nt DNA templates containing an 8-  
 491 oxoGua, 8-oxoGua-N<sub>3</sub>, 8-oxoGua-N<sub>3</sub>-SS-Biotin, and 8-oxoGua-N<sub>3</sub>-SH, respectively.  
 492 The molecular weight is indicated with calculated value ( $m/z_{cal}$ ) and observed value  
 493 ( $m/z_{obs}$ ), respectively.  
 494

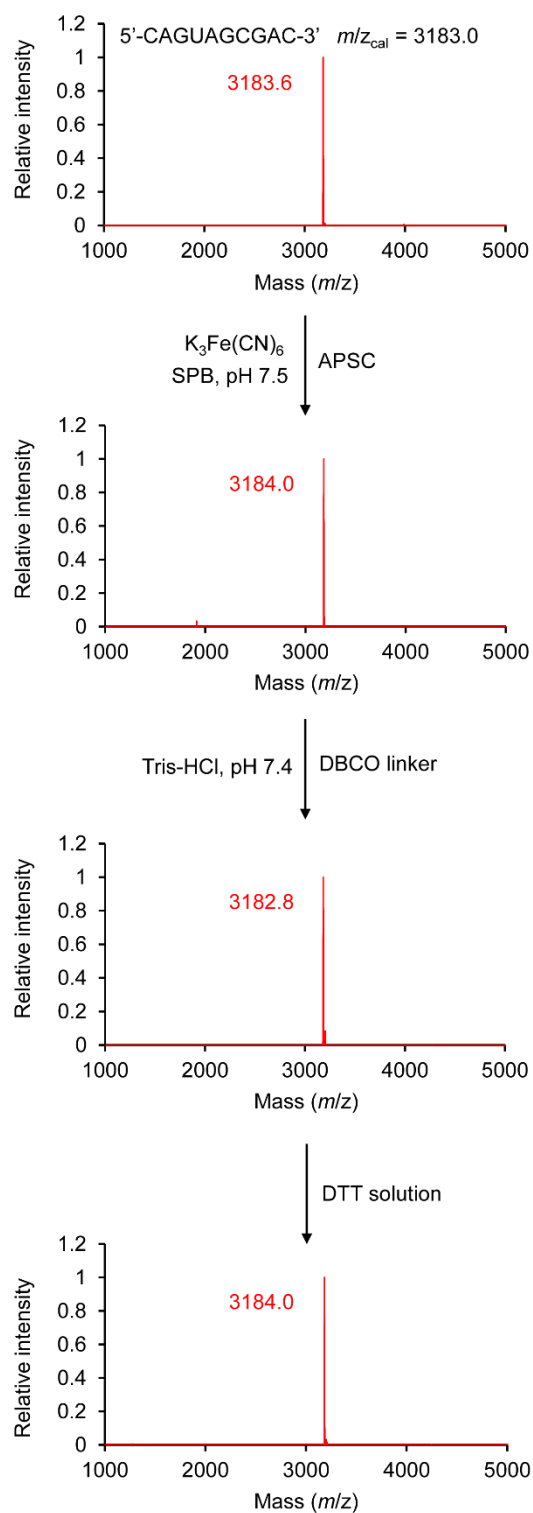

495

496 **Fig. S10.** ESI-ITMS characterization of the 10-nt RNA templates (without 8-oxoGua)  
 497 undergoing APSC tagging reaction, click reaction with DBCO linker, and treatment  
 498 with DTT. The molecular weight has not changed throughout the process. This result  
 499 indicates the APSC adduct is not formed with the natural RNA without 8-oxoGua and  
 500 the RNA chain is not degraded.

501

502

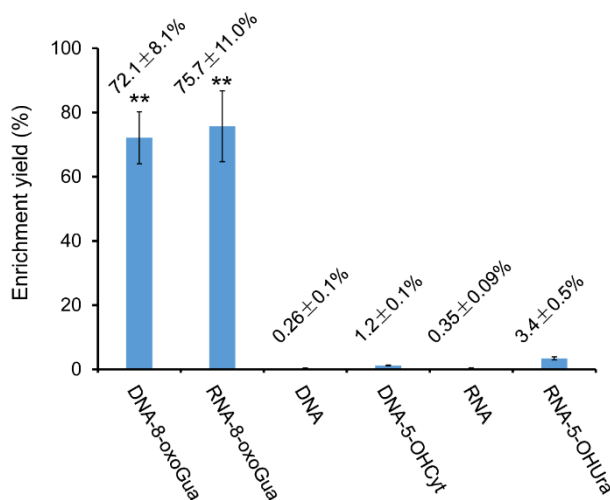

503

504 **Fig. S11.** Assessment for pull-down enrichment yield of the DNA and RNA templates,  
505 respectively. Statistical significance is indicated with \*\* ( $p \leq 0.01$ ) between DNA-8-  
506 oxoGua and DNA-5-OHCyt as well as between RNA-8-oxoGua and RNA-5-OHUra,  
507 respectively.

508

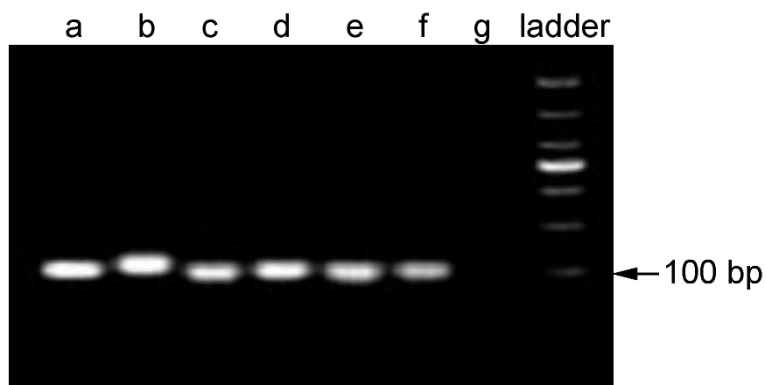

509

510 **Fig. S12.** Agarose gel electrophoresis analysis of PCR product. Lane a: 100-bp DNA  
511 template. Lane b: 100-bp DNA containing 8-oxoGua-N3-SH. Lane c: PCR product  
512 with Deep Vent® (exo-) DNA Polymerase (NEB). Lane d: PCR product with TruePrep  
513 Amplify Enzyme (Vazyme). Lane e: PCR product with Pfu DNA Polymerase  
514 (Promega). Lane f: PCR product with Q5® High-Fidelity DNA Polymerases (NEB).  
515 Lane g: PCR product of the enriched sample using 8-oxoGua enrichment lacking APSC  
516 labeling, under Deep Vent® (exo-) DNA Polymerase (NEB). No PCR product  
517 indicated almost no nonspecific enrichment of DNA.

518

519

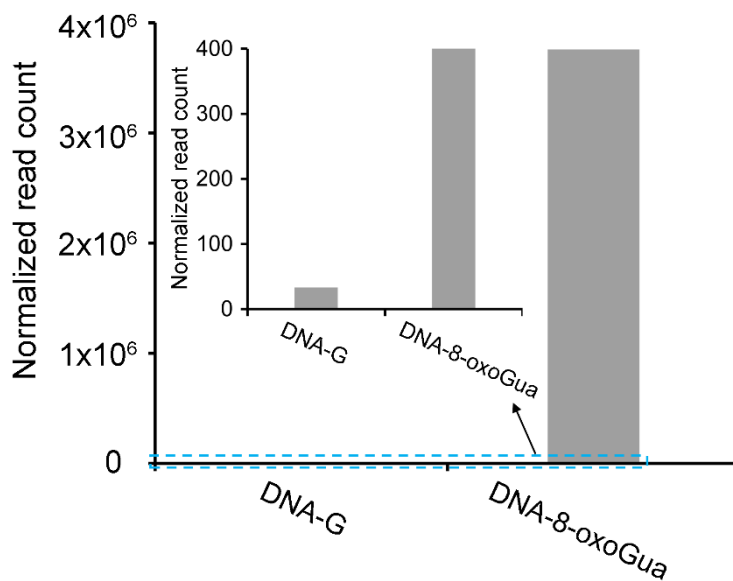

520

521 **Fig. S13.** Next-generation sequencing tests for enrichment of the DNA with 8-oxoGua  
522 (DNA-8-oxoGua) than the DNA without 8-oxoGua (DNA-G) that were spiked in  
523 genomic DNA fragments.

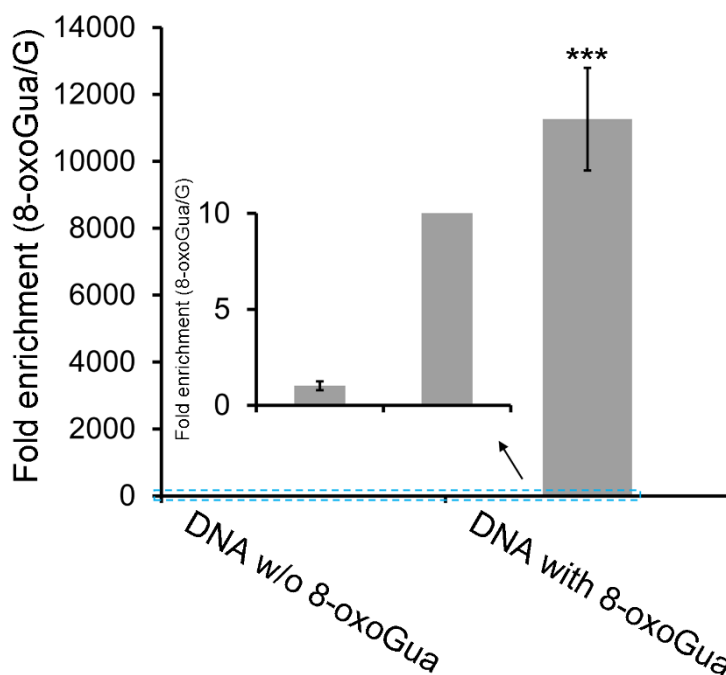

524

525 **Fig. S14.** qPCR verification for enrichment of the spiked DNA with or without (w/o)  
526 an 8-oxoGua.

527

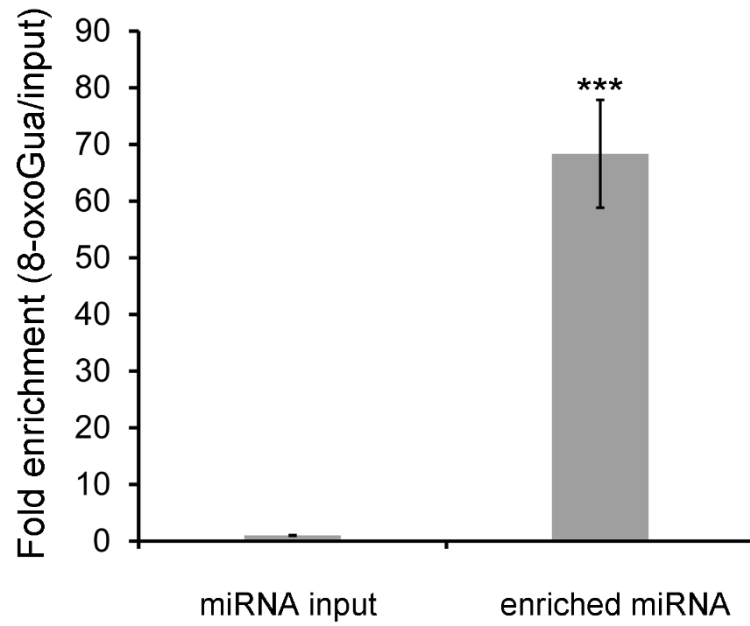

528

529 **Fig. S15.** qPCR verification for enrichment of the spiked 8-oxoGua-containing RNA.

530

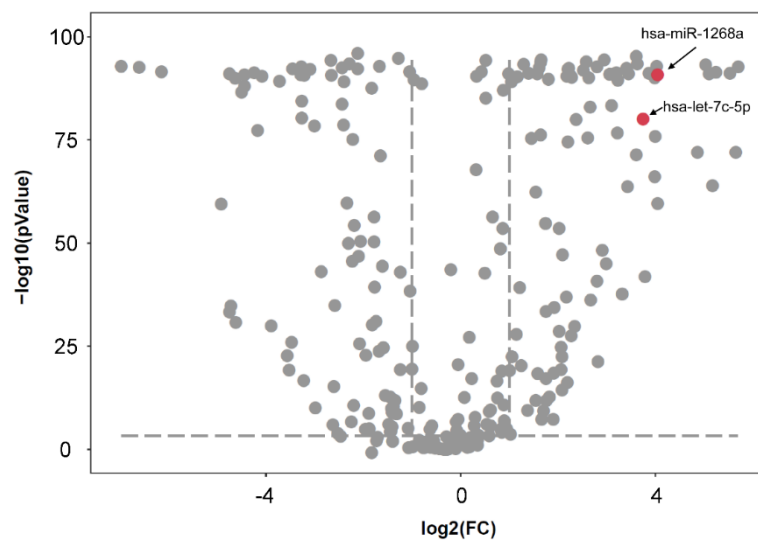

531

532 **Fig. S16.** The results of APSC-8-oxoGua-seq for miRNAs of the VSMCs without H<sub>2</sub>O<sub>2</sub>  
 533 treatment. The red dot indicated the typical miRNAs with 8-oxoGua modification in  
 534 seed region.

535



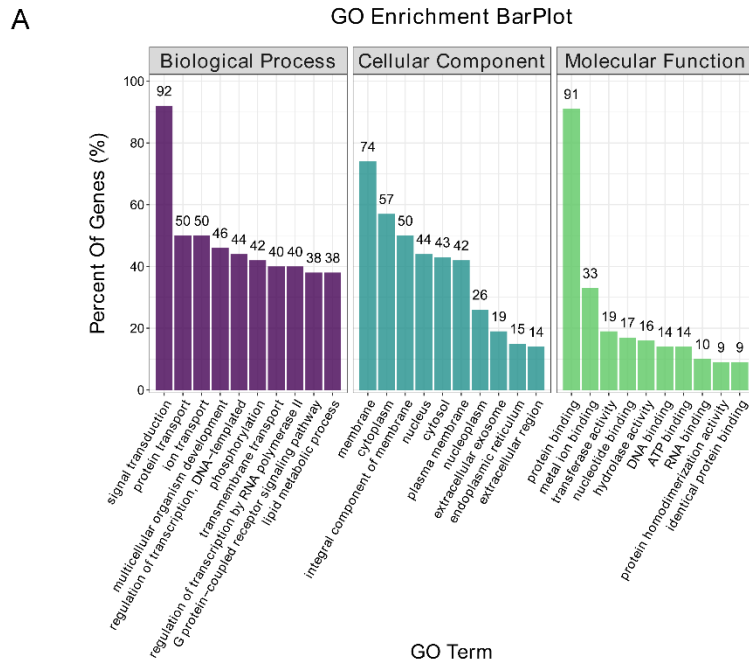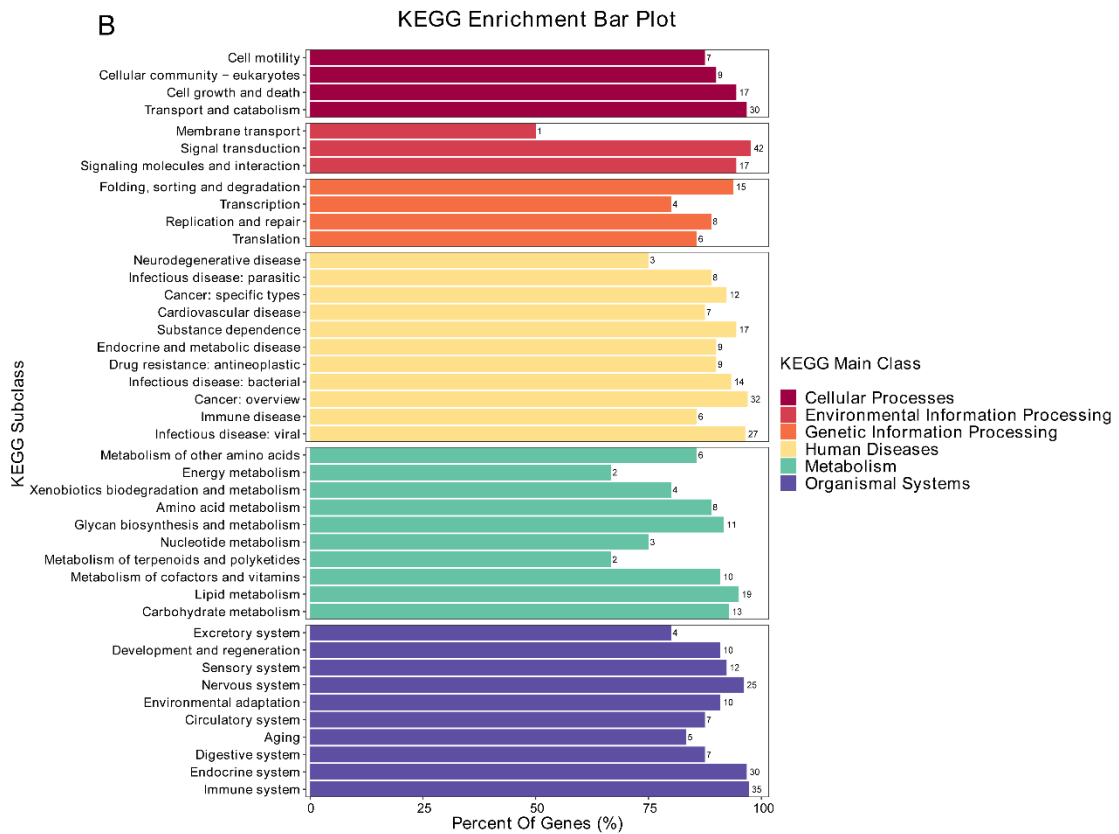

536

537 **Fig. S17.** GO analysis (A) and KEGG analysis (B) for the differential target genes after  
 538 substituting 8-oxoGua with U at position 2 of miR-1268a sequence.

539

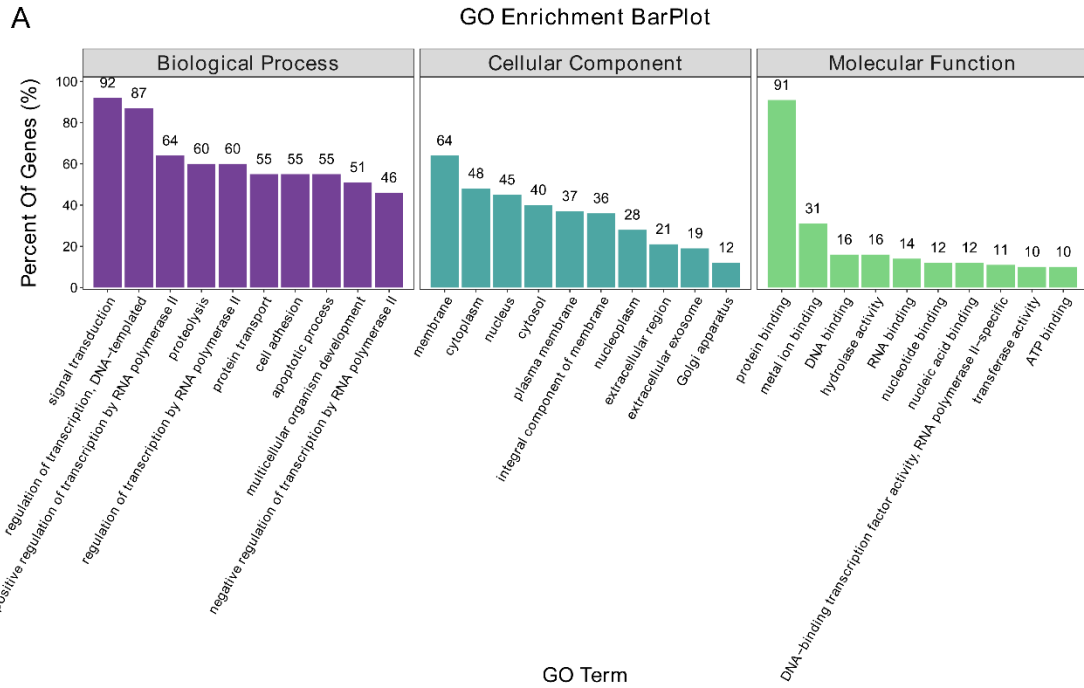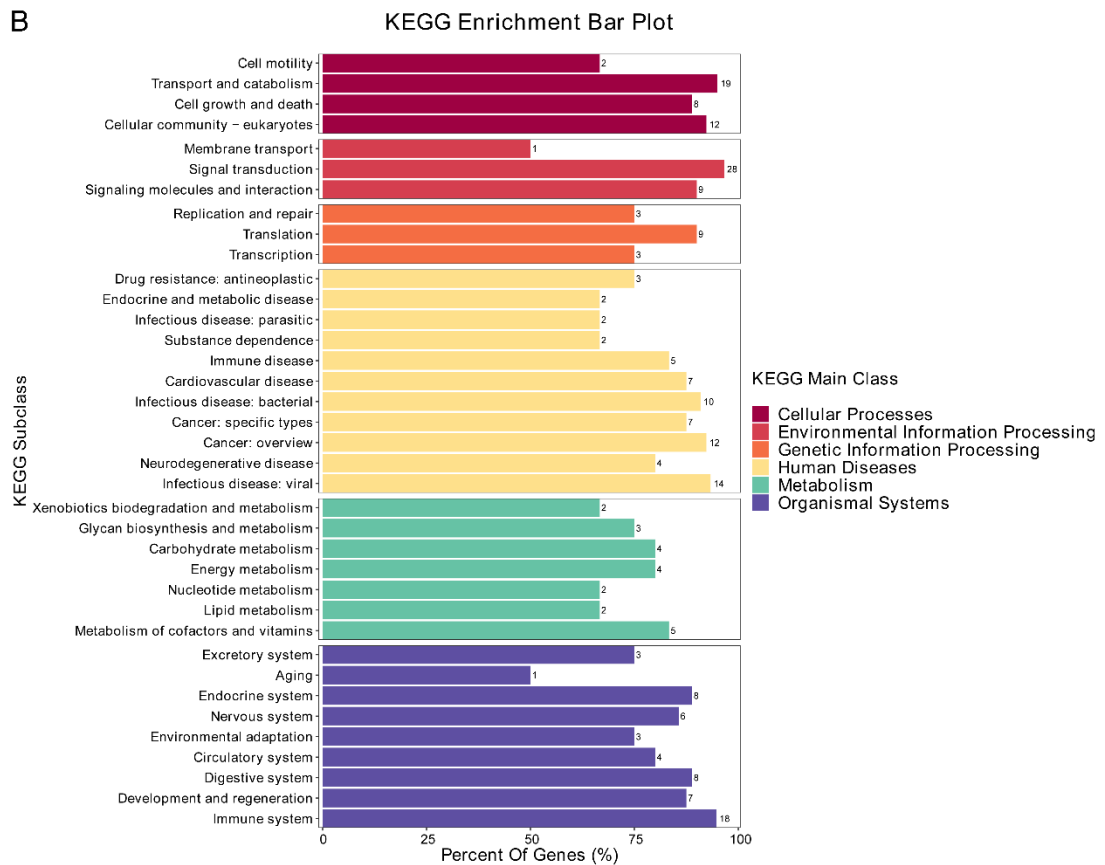

540

541 **Fig. S18.** GO analysis (A) and KEGG analysis (B) of the differential target genes after  
 542 substituting 8-oxoGua with U at position 8 of miR-1268a sequence.

543

**Table S1.** The overlapped oxidized miRNAs.

| Name                       | Sequence (5'-3')         |
|----------------------------|--------------------------|
| pal-miR-9993a-3p           | ATCTCGGTGGGACCTCCA       |
| hsa-miR-3168_R+1_1ss14AC   | GAGTTCTACAGTCCGACA       |
| hsa-miR-320d_R-1           | AAAAGCTGGGTTGAGAGG       |
| bta-miR-2478_L-2           | ATCCCACTTCTGACACCA       |
| hsa-miR-320a-3p            | AAAAGCTGGGTTGAGAGGGCGA   |
| hsa-miR-139-5p             | TCTACAGTGCACGTGTCTCCAGT  |
| hsa-miR-320b_R-2           | AAAAGCTGGGTTGAGAGGGC     |
| hsa-miR-3620-5p_R-2        | GTGGGCTGGGCTGGGCTGGG     |
| mmu-miR-3968_L-3_1ss14AT   | ATCCCACTCCTGACACCA       |
| cgr-mir-1285-p3_1ss1TC     | CACTGCACTCCAGCCTGGGC     |
| oan-miR-1386               | CTCCTGGCTGGCTCGCCA       |
| hsa-miR-92b-5p_R+2         | AGGGACGGGACGCGGTGCAGTGTT |
| pal-miR-9226-5p_L-3        | AGTCCCTGTTCGGGCGCCA      |
| eca-miR-296_L-1R-3_1ss10GT | AGGGTTGGTTGGAGGCTT       |
| pal-miR-9993b-3p_1ss9GT    | ATCTCGCTTGGGCCTCCA       |
| hsa-miR-1275_R+1           | GTGGGGGAGAGGCTGTCTG      |
| PC-3p-31279_64             | AGCAGGACTGTGGCCATGGAAGT  |
| hsa-mir-1303-p5            | CTGGGCAACATAGCGAGAC      |
| hsa-miR-486-5p             | TCCTGTACTGAGCTGCCCCGAG   |
| hsa-miR-125a-5p            | TCCCTGAGACCCTTTAACCTGTGA |
| hsa-miR-320c_R-1           | AAAAGCTGGGTTGAGAGGG      |
| hsa-miR-483-5p_L-1R+3      | AGACGGGAGGAAAGAAGGGAGTGG |
| hsa-miR-4484_L+2R-4        | AAAAAAGGCGGGAGAAGC       |
| hsa-miR-23a-5p             | GGGGTTCCTGGGGATGGGATTT   |
| hsa-miR-375-3p             | TTGTTCGTTCGGCTCGCGTGA    |
| eca-miR-296_L-1R-2         | AGGGTTGGGTGGAGGCTTT      |
| pal-miR-9993b-3p           | ATCTCGCTGGGGCCTCCA       |
| oan-miR-1386_1ss7GA        | CTCCTGACTGGCTCGCCA       |
| hsa-miR-574-5p             | TGAGTGTGTGTGTGTGAGTGTGT  |
| hsa-miR-122-5p_R-1         | TGGAGTGTGACAATGGTGTTT    |
| hsa-mir-5100-p3_1ss17TC    | ATCCCAGCGGTGCCTCCA       |
| mmu-mir-6240-p3_1ss22GT_1  | ATTTCTGCCAGTGCTCTGAATG   |
| efu-mir-9277-p5_1ss1CG     | GGTGGCCGAGTGGTTAAG       |

|                        |                         |
|------------------------|-------------------------|
| hsa-miR-150-5p         | TCTCCCAACCCTTGTACCAGTG  |
| hsa-miR-99a-5p_R-1     | AACCCGTAGATCCGATCTTGT   |
| hsa-let-7c-5p          | TGAGGTAGTAGGTTGTATGGTT  |
| PC-3p-14138_148        | AAAAGGGGGCTGAGGTGGAGG   |
| hsa-miR-1268a          | CGGGCGTGGTGGTGGGGG      |
| hsa-miR-126-3p         | TCGTACCGTGAGTAATAATGCG  |
| hsa-miR-205-5p         | TCCTTCATTCCACCGGAGTCTG  |
| hsa-miR-145-5p         | GTCCAGTTTTCCCAGGAATCCCT |
| hsa-miR-143-3p_R+1     | TGAGATGAAGCACTGTAGCTCT  |
| hsa-miR-203a-3p        | GTGAAATGTTTAGGACCACTAG  |
| hsa-miR-126-5p         | CATTATTACTTTTGGTACGCG   |
| mmu-mir-1983-p3_1ss2GA | TAATGCCGAGGTTGTGAGTT    |

---

545

546 **Table S2.** APSC-8-oxoGua-seq result of a 100-bp DNA template containing two 8-  
547 oxoGua modification.

| Position-base <sup>[a]</sup> | A <sup>[b]</sup> | C <sup>[b]</sup> | G <sup>[b]</sup> | T <sup>[b]</sup> |
|------------------------------|------------------|------------------|------------------|------------------|
| 1C                           | 0                | 30               | 0                | 0                |
| 2C                           | 0                | 29               | 1                | 0                |
| 3G                           | 0                | 0                | 30               | 0                |
| 4C                           | 0                | 30               | 0                | 0                |
| 5T                           | 0                | 0                | 0                | 30               |
| 6C                           | 0                | 30               | 0                | 0                |
| 7G                           | 0                | 0                | 30               | 0                |
| 8A                           | 30               | 0                | 0                | 0                |
| 9G                           | 0                | 0                | 30               | 0                |
| 10A                          | 30               | 0                | 0                | 0                |
| 11T                          | 0                | 0                | 0                | 30               |
| 12C                          | 0                | 30               | 0                | 0                |
| 13G                          | 0                | 0                | 30               | 0                |
| 14A                          | 30               | 0                | 0                | 0                |
| 15T                          | 0                | 0                | 0                | 30               |
| 16C                          | 0                | 30               | 0                | 0                |
| 17G                          | 0                | 0                | 30               | 0                |
| 18A                          | 30               | 0                | 0                | 0                |
| 19T                          | 0                | 0                | 0                | 30               |
| 20C                          | 0                | 30               | 0                | 0                |
| 21G                          | 0                | 0                | 30               | 0                |
| 22A                          | 30               | 0                | 0                | 0                |
| 23T                          | 0                | 0                | 0                | 30               |

|          |    |    |    |    |
|----------|----|----|----|----|
| 24C      | 0  | 30 | 0  | 0  |
| 25G      | 0  | 0  | 30 | 0  |
| 26A      | 30 | 0  | 0  | 0  |
| 27T      | 0  | 0  | 0  | 30 |
| 28C      | 0  | 30 | 0  | 0  |
| 29G      | 0  | 0  | 30 | 0  |
| 30A      | 30 | 0  | 0  | 0  |
| 31A      | 30 | 0  | 0  | 0  |
| 32T      | 0  | 0  | 0  | 30 |
| 33C      | 0  | 30 | 0  | 0  |
| 8-oxoGua | 0  | 0  | 3  | 27 |
| 35A      | 30 | 0  | 0  | 0  |
| 36T      | 0  | 0  | 0  | 30 |
| 37C      | 0  | 30 | 0  | 0  |
| 38G      | 0  | 0  | 30 | 0  |
| 39A      | 30 | 0  | 0  | 0  |
| 40T      | 0  | 0  | 0  | 30 |
| 41C      | 0  | 30 | 0  | 0  |
| 42G      | 0  | 0  | 30 | 0  |
| 43A      | 30 | 0  | 0  | 0  |
| 44T      | 0  | 0  | 0  | 30 |
| 45C      | 0  | 30 | 0  | 0  |
| 46G      | 0  | 0  | 30 | 0  |
| 47A      | 30 | 0  | 0  | 0  |
| 48T      | 0  | 0  | 0  | 30 |
| 49C      | 0  | 30 | 0  | 0  |
| 50G      | 0  | 0  | 30 | 0  |
| 51A      | 30 | 0  | 0  | 0  |
| 52T      | 0  | 0  | 0  | 30 |
| 53C      | 0  | 30 | 0  | 0  |
| 54A      | 30 | 0  | 0  | 0  |
| 55T      | 0  | 0  | 0  | 30 |
| 56C      | 0  | 30 | 0  | 0  |
| 57G      | 0  | 0  | 30 | 0  |
| 58T      | 0  | 0  | 0  | 30 |
| 59A      | 30 | 0  | 0  | 0  |
| 60G      | 0  | 0  | 30 | 0  |
| 61C      | 0  | 30 | 0  | 0  |
| 62A      | 30 | 0  | 0  | 0  |
| 63T      | 0  | 0  | 0  | 30 |
| 64C      | 0  | 30 | 0  | 0  |
| 8-oxoGua | 0  | 0  | 5  | 25 |
| 66A      | 30 | 0  | 0  | 0  |
| 67C      | 0  | 30 | 0  | 0  |

|      |    |    |    |    |
|------|----|----|----|----|
| 68A  | 30 | 0  | 0  | 0  |
| 69T  | 0  | 0  | 0  | 30 |
| 70G  | 0  | 0  | 30 | 0  |
| 71A  | 30 | 0  | 0  | 0  |
| 72T  | 0  | 0  | 0  | 30 |
| 73C  | 0  | 30 | 0  | 0  |
| 74G  | 0  | 0  | 30 | 0  |
| 75A  | 30 | 0  | 0  | 0  |
| 76T  | 0  | 0  | 0  | 30 |
| 77C  | 0  | 30 | 0  | 0  |
| 78G  | 0  | 0  | 30 | 0  |
| 79A  | 30 | 0  | 0  | 0  |
| 80A  | 30 | 0  | 0  | 0  |
| 81T  | 0  | 0  | 0  | 30 |
| 82C  | 0  | 30 | 0  | 0  |
| 83G  | 0  | 0  | 30 | 0  |
| 84A  | 30 | 0  | 0  | 0  |
| 85T  | 0  | 0  | 0  | 30 |
| 86C  | 0  | 30 | 0  | 0  |
| 87G  | 0  | 0  | 30 | 0  |
| 88A  | 30 | 0  | 0  | 0  |
| 89T  | 0  | 0  | 0  | 30 |
| 90C  | 0  | 29 | 0  | 1  |
| 91G  | 0  | 0  | 30 | 0  |
| 92A  | 29 | 0  | 1  | 0  |
| 93G  | 0  | 0  | 30 | 0  |
| 94G  | 0  | 0  | 30 | 0  |
| 95T  | 0  | 0  | 0  | 30 |
| 96A  | 30 | 0  | 0  | 0  |
| 97C  | 0  | 30 | 0  | 0  |
| 98C  | 0  | 30 | 0  | 0  |
| 99C  | 0  | 30 | 0  | 0  |
| 100A | 30 | 0  | 0  | 0  |

548 [a] Position and pre-designed base type in positive-sense strand of DNA from 5' to 3'.

549 [b] The number of base (namely A, C, G, T) in sequencing reads at each position.

550

## 551 References

- 552 1. M. E. Hosford, J. G. Muller and C. J. Burrows, *Journal of the American Chemical Society*, 2004,  
553 **126**, 9540-9541.
- 554 2. L. Xue and M. M. Greenberg, *Journal of the American Chemical Society*, 2007, **129**, 7010-+.
- 555 3. J. X. Wang, J. Gao, S. L. Ding, K. Wang, J. Q. Jiao, Y. Wang, T. Sun, L. Y. Zhou, B. Long, X. J. Zhang,

556 Q. Li, J. P. Liu, C. Feng, J. Liu, Y. Gong, Z. Zhou and P. F. Li, *Mol Cell*, 2015, **59**, 50-61.  
557 4. C. X. Song, K. E. Szulwach, Y. Fu, Q. Dai, C. Yi, X. Li, Y. Li, C. H. Chen, W. Zhang, X. Jian, J. Wang, L.  
558 Zhang, T. J. Looney, B. Zhang, L. A. Godley, L. M. Hicks, B. T. Lahn, P. Jin and C. He, *Nat*  
559 *Biotechnol*, 2011, **29**, 68-72.  
560  
561  
562  
563
